# Supplementary material for: Reversible Dissociation and Ligand-Glutathione Exchange Reaction in Binuclear Cationic Tetranitrosyl Iron Complex with Penicillamine
Source: Hindawi journal article supplement (doi:10.1155/2014/641407), 2014-01-01
Supplement: f1 [file 641407.f1.pdf]

Supplementary data.

Kinetics of change of difference spectra at the interaction of **(I)** and **(II)** with Hb.

**(I)** complex  $[\text{Fe}_2(\text{SC}_5\text{H}_{11}\text{NO}_2)_2(\text{NO})_4]\text{SO}_4 \cdot 5\text{H}_2\text{O}$

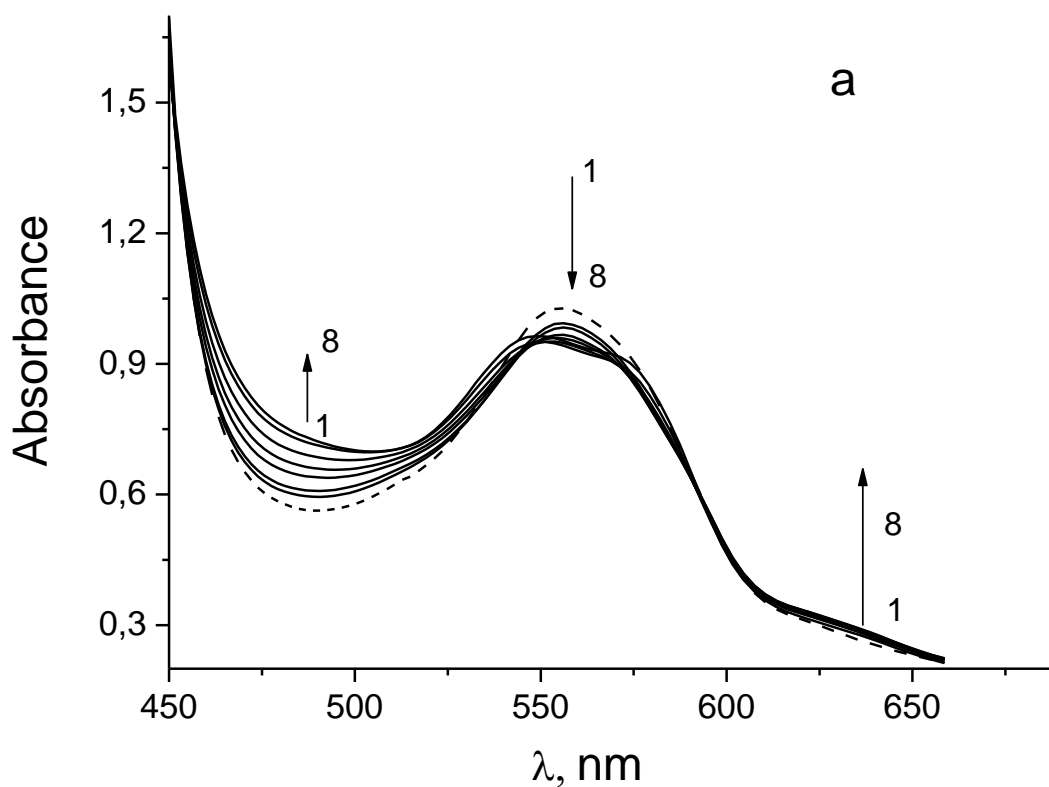

**(II)** complex  $[\text{Fe}_2(\text{SC}_{10}\text{H}_{17}\text{N}_3\text{O}_6)_2(\text{NO})_4]\text{SO}_4 \cdot 2\text{H}_2\text{O}$

a) Kinetics of change of difference spectra at the interaction of **(II)** ( $1.5 \cdot 10^{-4}$  M) with Hb ( $2 \cdot 10^{-5}$  M). Dotted line (1) is spectrum of Hb. Spectra 2-8 were registered at 0.5 (2), 1 (3), 3 (4), 5 (5), 7 (6), 9 (7), 11(8) h after start of reaction. Conditions of reaction: 25 °C, solvent is 0.05 M Tris-HCl buffer, pH 7.0.

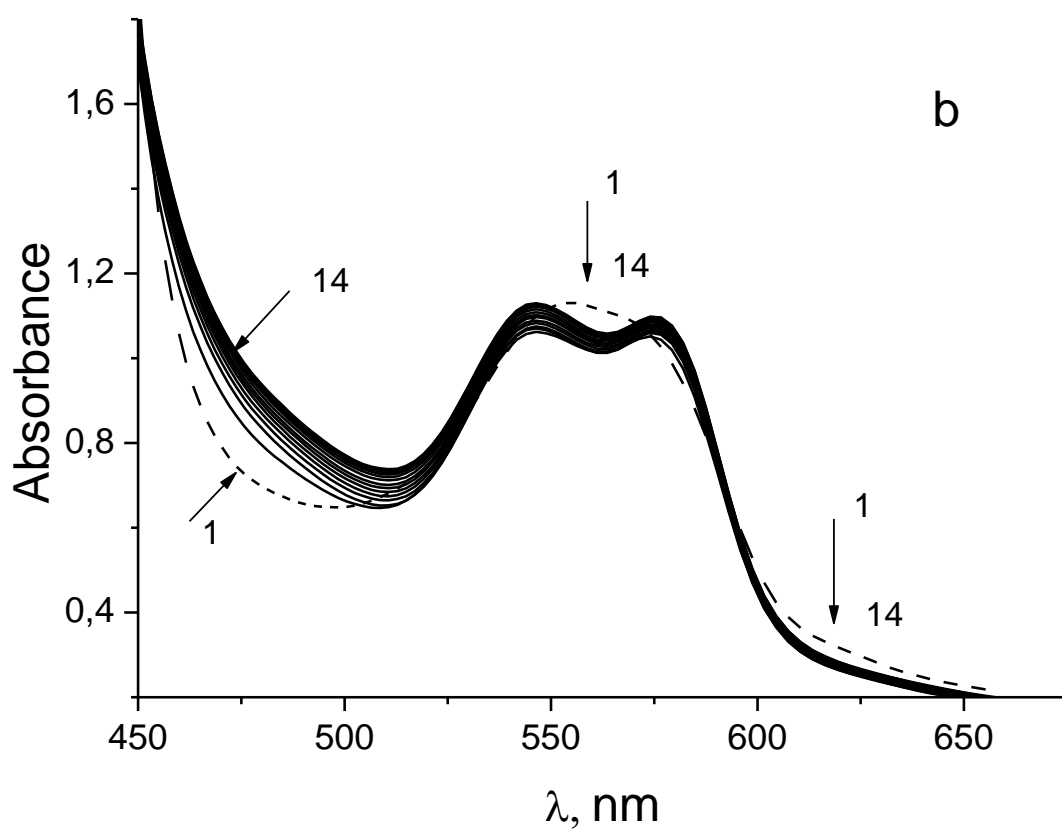

b) Kinetics of change of difference spectra at the interaction of **(1)** ( $1.5 \cdot 10^{-4}$  M) with Hb ( $2 \cdot 10^{-5}$  M). Dotted line (1) is the spectrum of Hb. Spectra 2-14 were registered at 0.05 (2), 0.16 (3), 0.33 (4), 0.5 (5), 0.66 (6), 0.8 (7), 1 (8), 1.25 (9), 1.5 (10), 1.75 (11), 2 (12), 2.23 (13) и 2.5 (14) h after start of reaction. Conditions of reaction: 25 °C, solvent is 0.05 M Tris-HCl buffer, pH 7.0



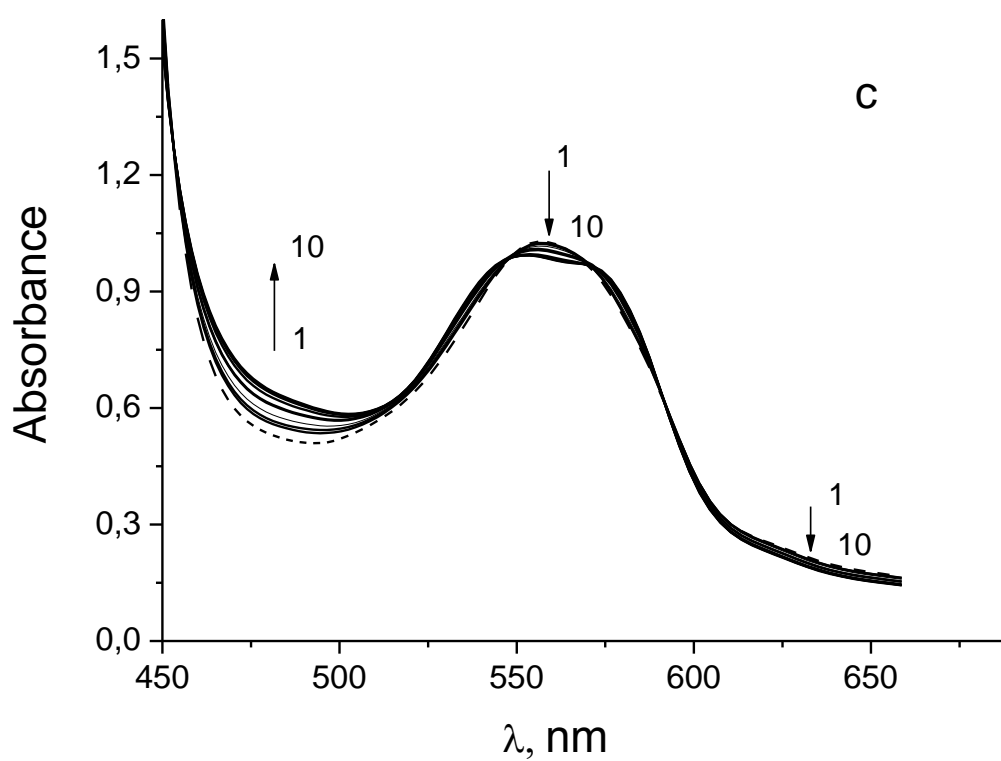

c) Kinetics of change of difference spectra at the interaction of **(1)** ( $1.5 \cdot 10^{-4}$  M) with GSH ( $10^{-3}$  M) in Hb ( $2 \cdot 10^{-5}$  M) presence. Dotted line (1) is the spectrum of Hb. Spectra 2-10 were registered at 0.01 (2), 0.16 (3), 0.3 (4), 1.4 (5), 2 (6), 3 (7), 4 (8), 4.5 (9), 5 (10) h after start of reaction. Conditions of reaction: 25 °C, solvent is 0.05 M Tris-HCl buffer, pH 7.0.
